# Supplementary material
Source: PubMed Central journal article supplement (PMC2851891)
Supplement: 0914199107_pnas.200914199SI.pdf [file 0914199107_pnas.200914199SI.pdf]

# Supporting Information

Baumiller et al. 10.1073/pnas.0914199107

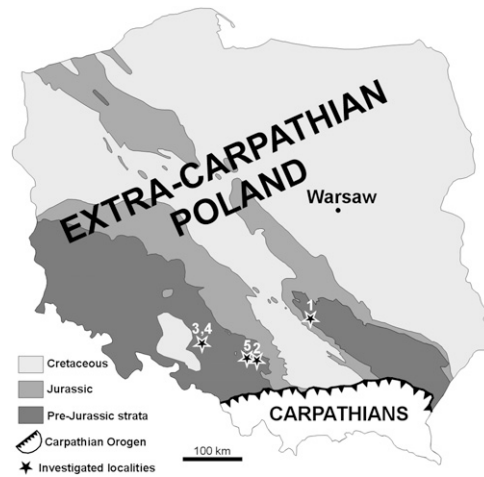

**Fig. S1.** Geologic Map of extra-Carpathian Poland with five Triassic crinoid localities. Each locality is numbered and for each the following information is provided: stratigraphic unit, age, crinoid taxa, number of skeletal elements examined, and the percentage of skeletal elements with characteristic marks ("affected"). (1) Starochęciny locality (near Kielce)—Röt (Scythian/Lower Anisian, early Middle Triassic, Holy Cross Mountains): 190 dadocrinid columnals and pluricolumnals, ca. 4% affected. (2) Wojkowice locality (near Katowice)—Gogolin Beds (Lower Anisian, Muschelkalk, Middle Triassic, Upper Silesia): ca. 1000 dadocrinid and holocrinid columnals and pluricolumnals, ca. 20% affected. (3) Strzelce Opolskie locality (near Opole)—Górażdże Formation (Middle Anisian, Pelsonian, Muschelkalk, Middle Triassic, Upper Silesia): 98 encrinid, carnallicrinid, eckicrinid, and holocrinid columnals and pluricolumnals, ca. 21% affected. (4) Tarnów Opolski and Strzelce Opolskie localities (near Opole)—Karchowice Formation (Middle Anisian, Pelsonian/Illyrian, Muschelkalk, Middle Triassic, Lower Silesia): 295 encrinid, silesiacrinid, carnallicrinid, holocrinid, and eckicrinid columnals and pluricolumnals, ca. 20% affected. (5) Piekary Śląskie locality (near Katowice)—Lower Diplopore beds (Upper Anisian, Illyrian, Middle Triassic, Muschelkalk, Upper Silesia): ca. 1,000 encrinid, silesiacrinid, carnallicrinid, holocrinid, and eckicrinid columnals and pluricolumnals, ca. 22% affected.

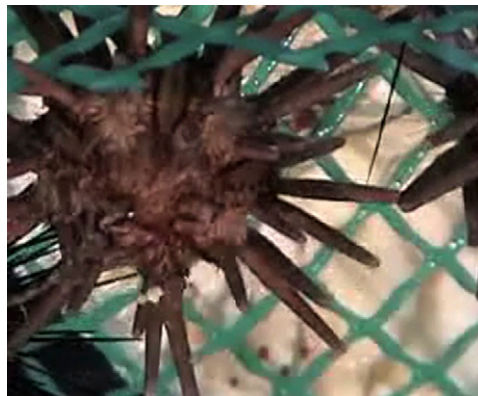

**Movie S1.** *Euclidaris* sp. consuming a comatulid brachial. The cidaroid can be seen ingesting the arm by pulling it in with the teeth of the Aristotle's lantern like a string of spaghetti.

[Movie S1](#)
